CORRECTION

# Correction: Chaperone-Mediated Autophagy Protein BAG3 Negatively Regulates Ebola and Marburg VP40-Mediated Egress

Jingjing Liang, Cari A. Sagum, Mark T. Bedford, Sachdev S. Sidhu, Marius Sudol, Ziyang Han, Ronald N. Harty

The authors would like to correct the use of the term “Chaperone-Mediated Autophagy (CMA)” throughout the article. Since the authors did not directly analyze autophagy processes in this article, all mentions of the specific process of “Chaperone-Mediated Autophagy (CMA)” should be removed from the article.

The term “Chaperone-Mediated Autophagy” appears ten times throughout the article: once in the title, twice in the Abstract, once in the Author Summary, once in the Introduction, twice in the Results, and three times in the Discussion.

The title should read “Co-Chaperone Protein BAG3 Negatively Regulates Ebola and Marburg VP40-Mediated Egress.”

Throughout the text, the use of “Chaperone-Mediated Autophagy (CMA)” should be deleted or replaced with “co-chaperone” depending on the context of the sentence.

All changes to the original article are detailed in a marked-up PDF included as [S1 File](#). A clean Word document version of the revised article is included as [S2 File](#).

The authors confirm that these changes do not alter their findings.

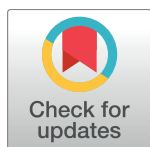

## Supporting information

**S1 File. Marked-up PDF detailing changes.**  
(PDF)

**S2 File. Clean Word version of revised article.**  
(DOCX)

## OPEN ACCESS

**Citation:** Liang J, Sagum CA, Bedford MT, Sidhu SS, Sudol M, Han Z, et al. (2017) Correction: Chaperone-Mediated Autophagy Protein BAG3 Negatively Regulates Ebola and Marburg VP40-Mediated Egress. PLoS Pathog 13(7): e1006519. <https://doi.org/10.1371/journal.ppat.1006519>

**Published:** July 19, 2017

**Copyright:** © 2017 Liang et al. This is an open access article distributed under the terms of the [Creative Commons Attribution License](#), which permits unrestricted use, distribution, and reproduction in any medium, provided the original author and source are credited.

## Reference

1. Liang J, Sagum CA, Bedford MT, Sidhu SS, Sudol M, Han Z, et al. (2017) Chaperone-Mediated Autophagy Protein BAG3 Negatively Regulates Ebola and Marburg VP40-Mediated Egress. PLoS Pathog 13(1): e1006132. <https://doi.org/10.1371/journal.ppat.1006132> PMID: 28076420
